# Supplementary material
Source: PubMed Central journal article supplement (PMC5510956)

Supporting Information

**Ketone-catalyzed photochemical C(sp<sup>3</sup>)-H chlorination**

Lei Han, Jibao Xia, Lin You and Chuo Chen\*

*Division of Chemistry, Department of Biochemistry, The University of Texas Southwestern  
Medical Center, Dallas, USA*

Email: [Chuo.Chen@UTSouthwestern.edu](mailto:Chuo.Chen@UTSouthwestern.edu)

# <sup>1</sup>H NMR of 12

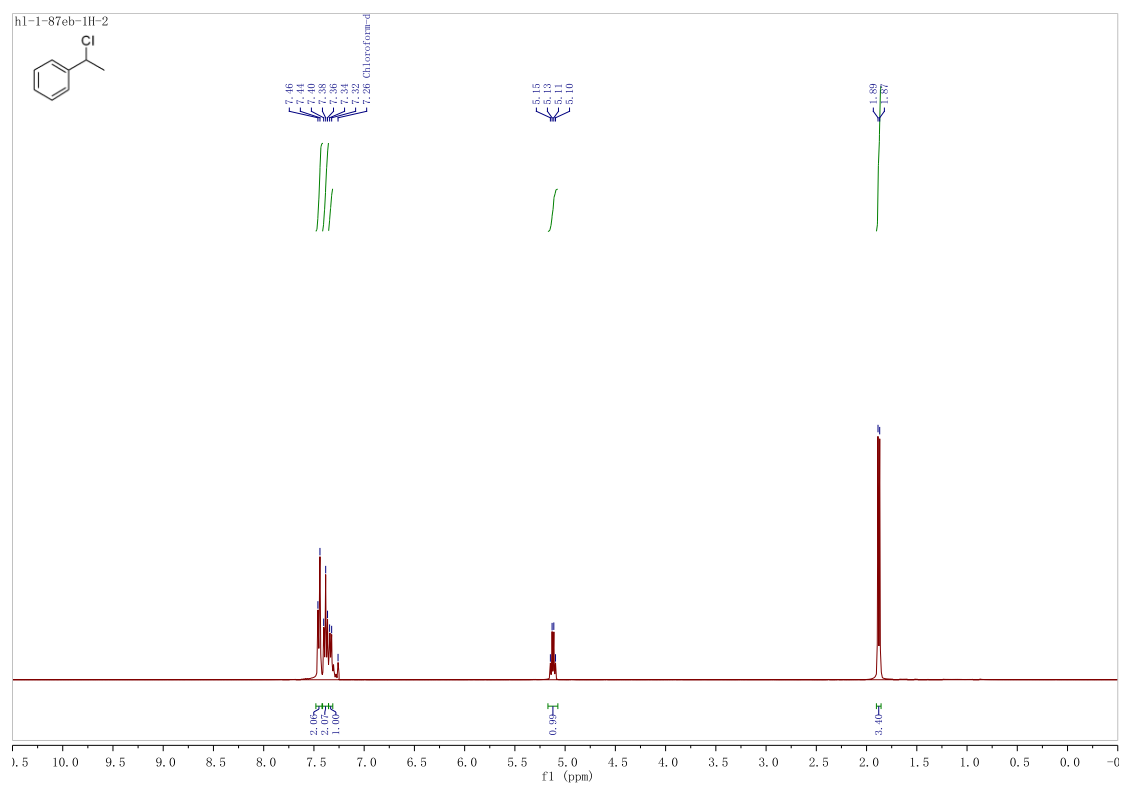

# <sup>13</sup>C NMR of 12

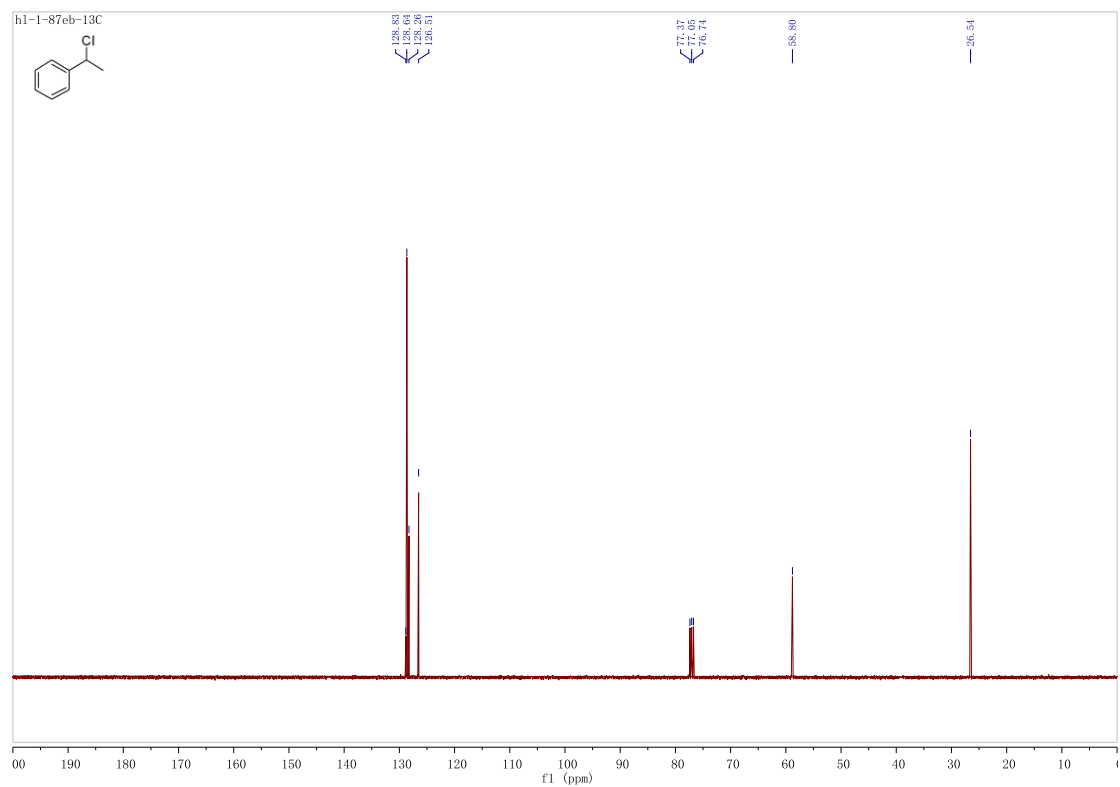

# <sup>1</sup>H NMR of 16

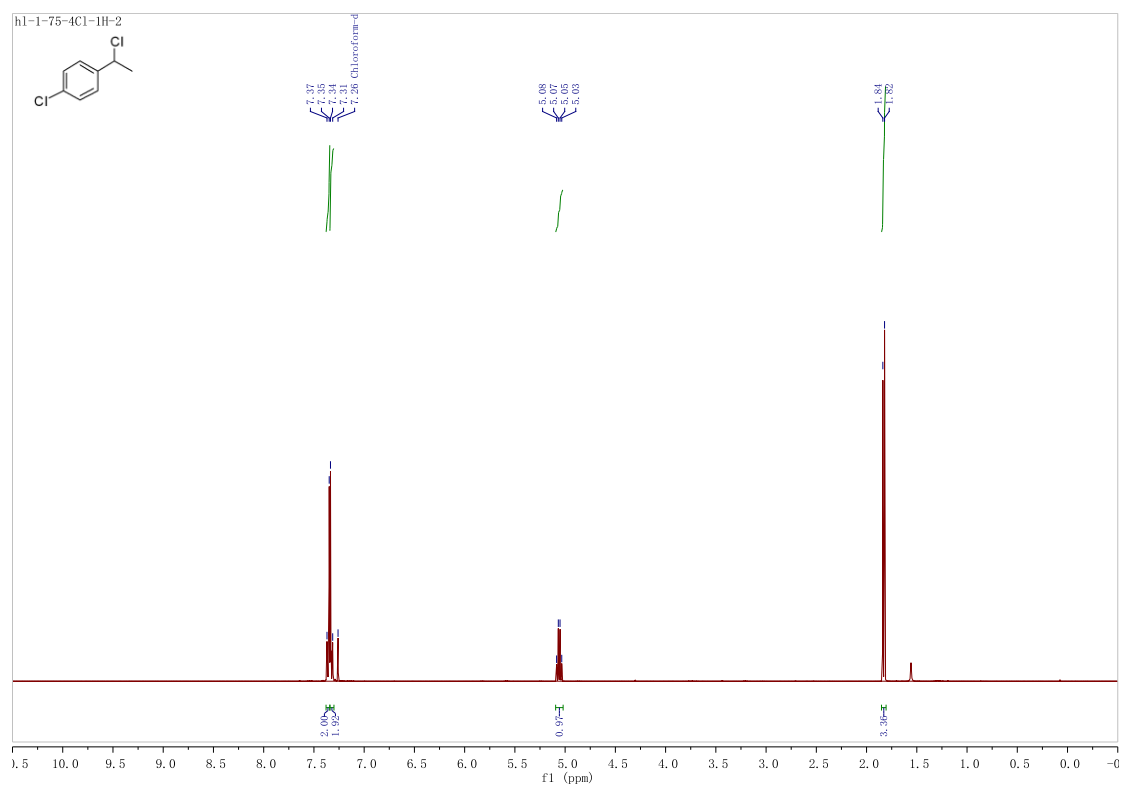

# <sup>13</sup>C NMR of 16

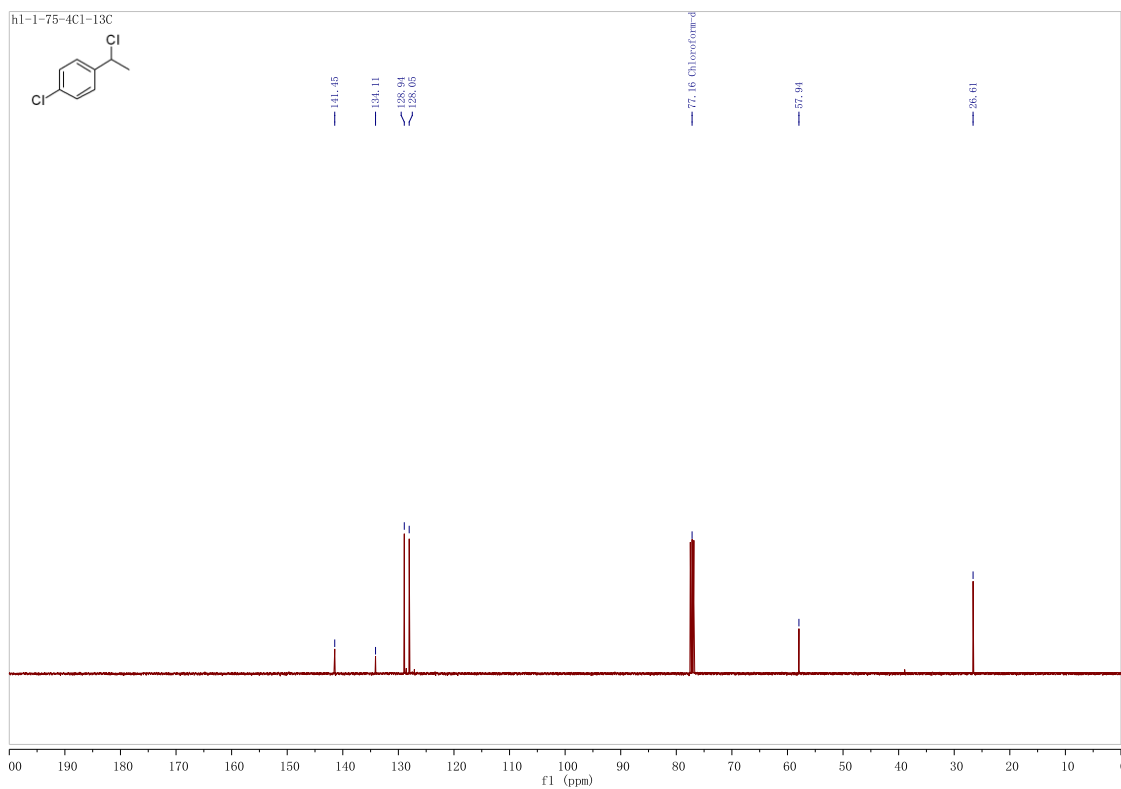



# <sup>1</sup>H NMR of 20

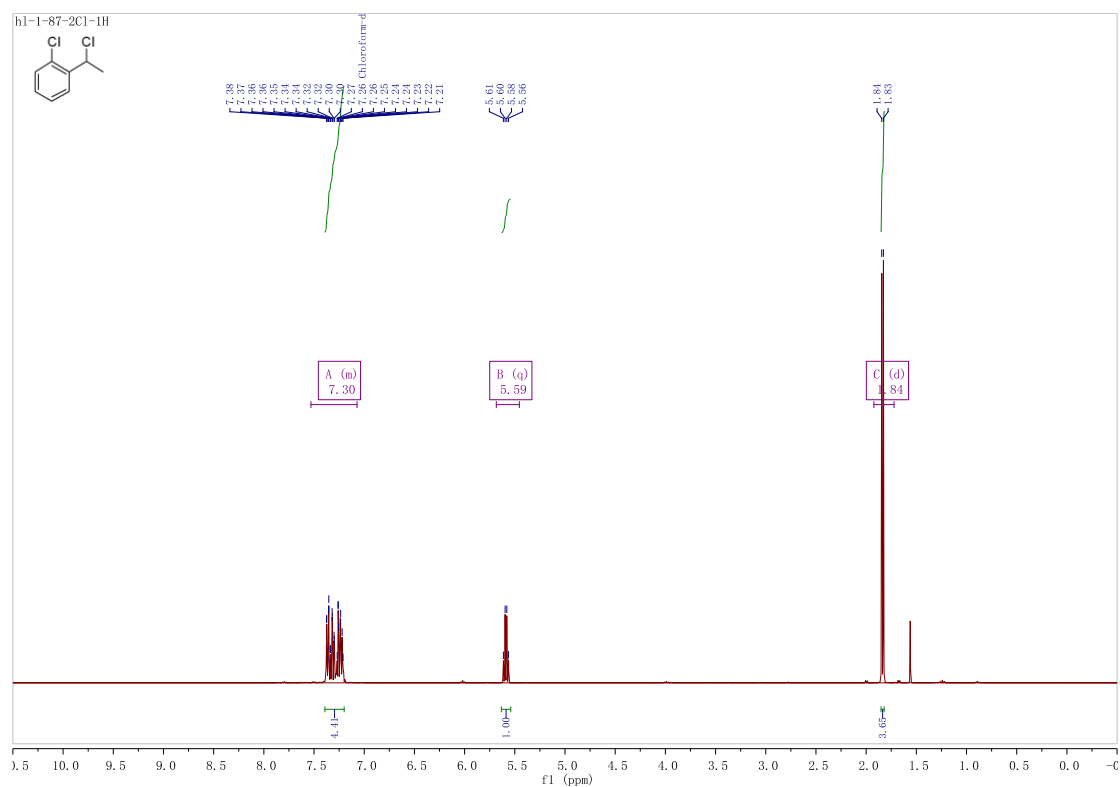

# <sup>13</sup>C NMR of 20

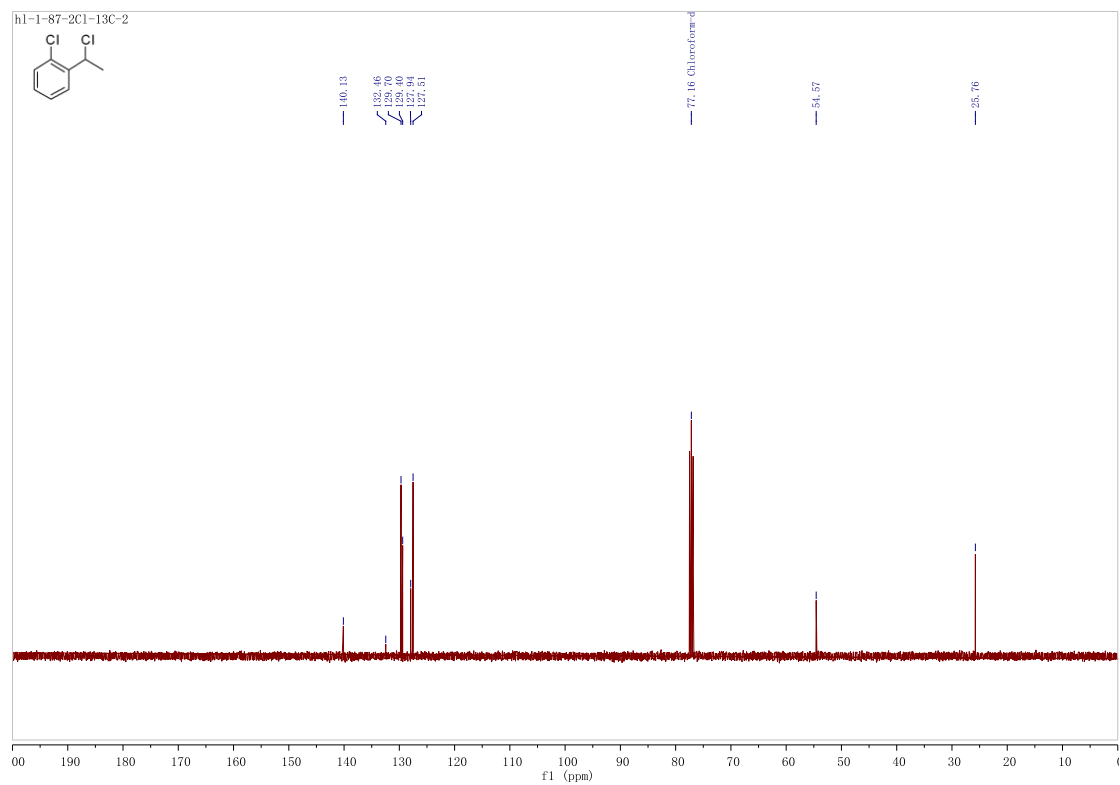

# <sup>1</sup>H NMR of 22

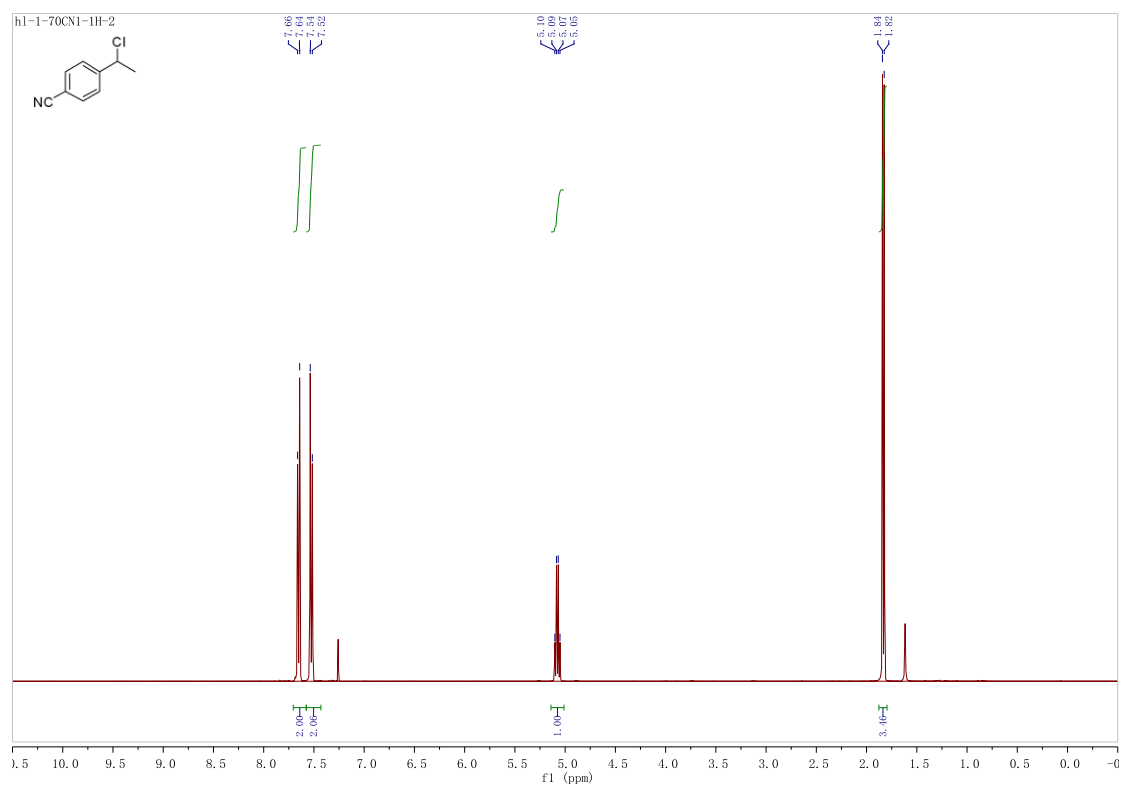

# <sup>13</sup>C NMR of 22

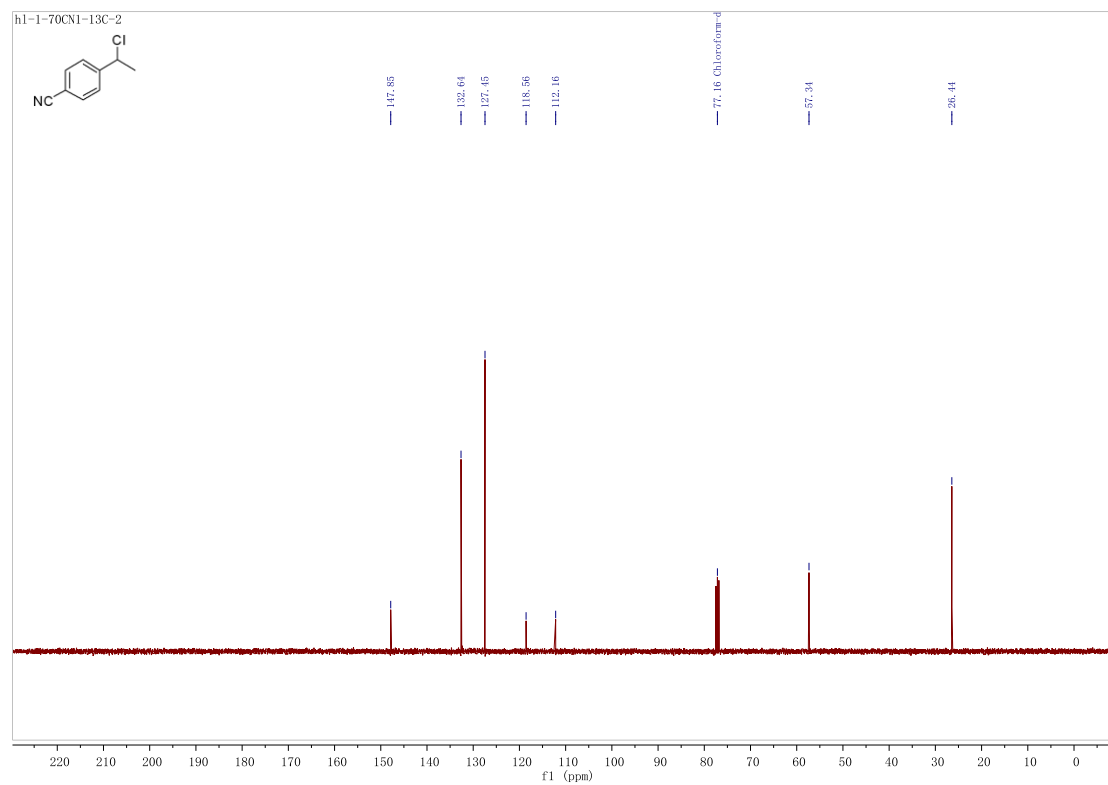

# <sup>1</sup>H NMR of 24

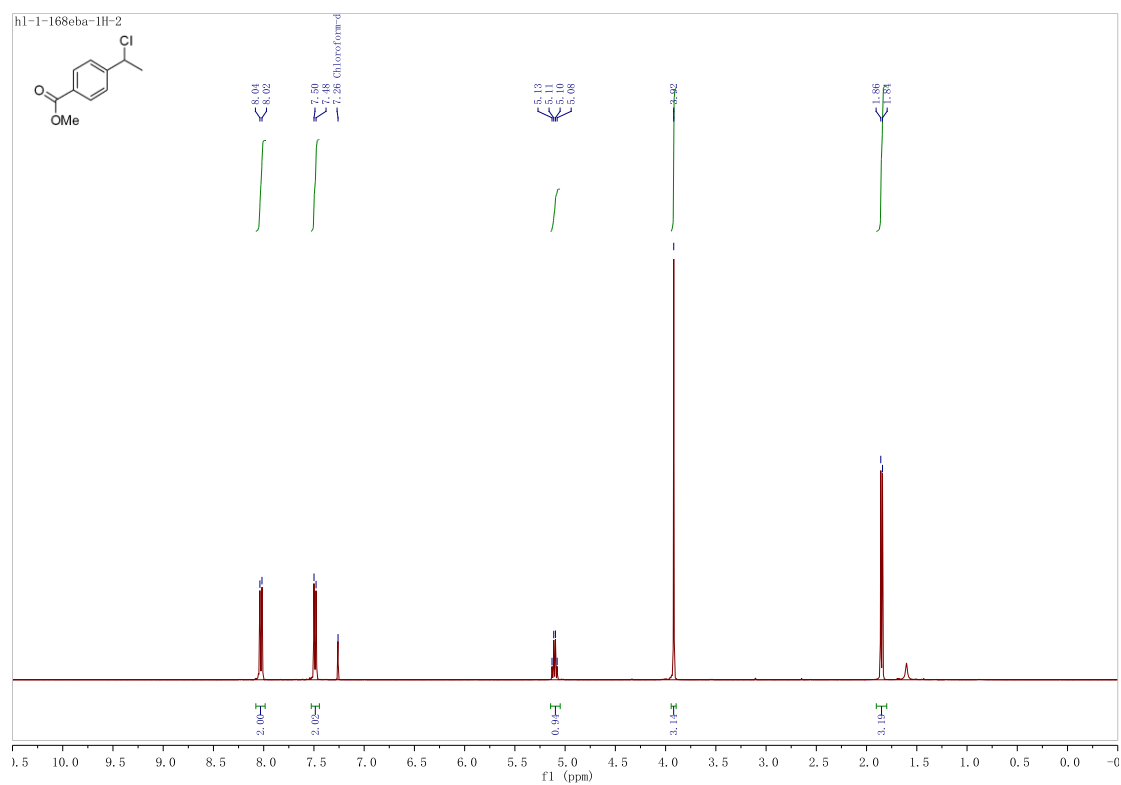

# <sup>13</sup>C NMR of 24

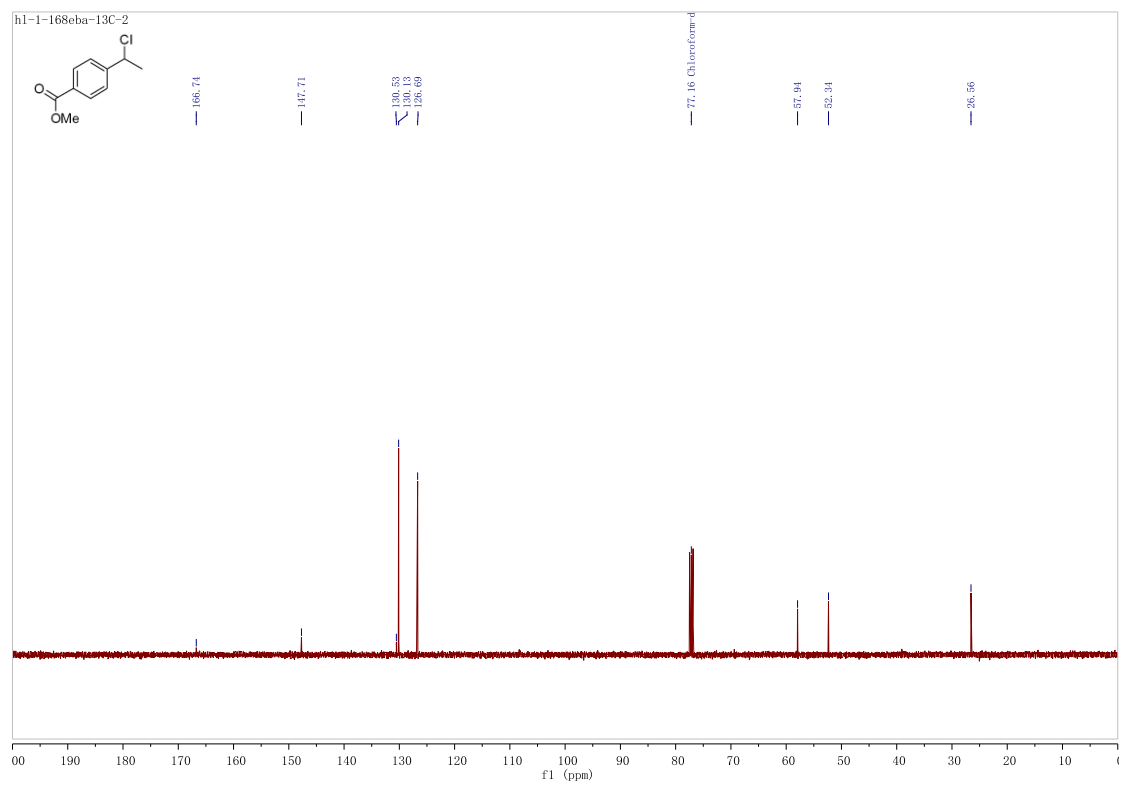

# <sup>1</sup>H NMR of 26

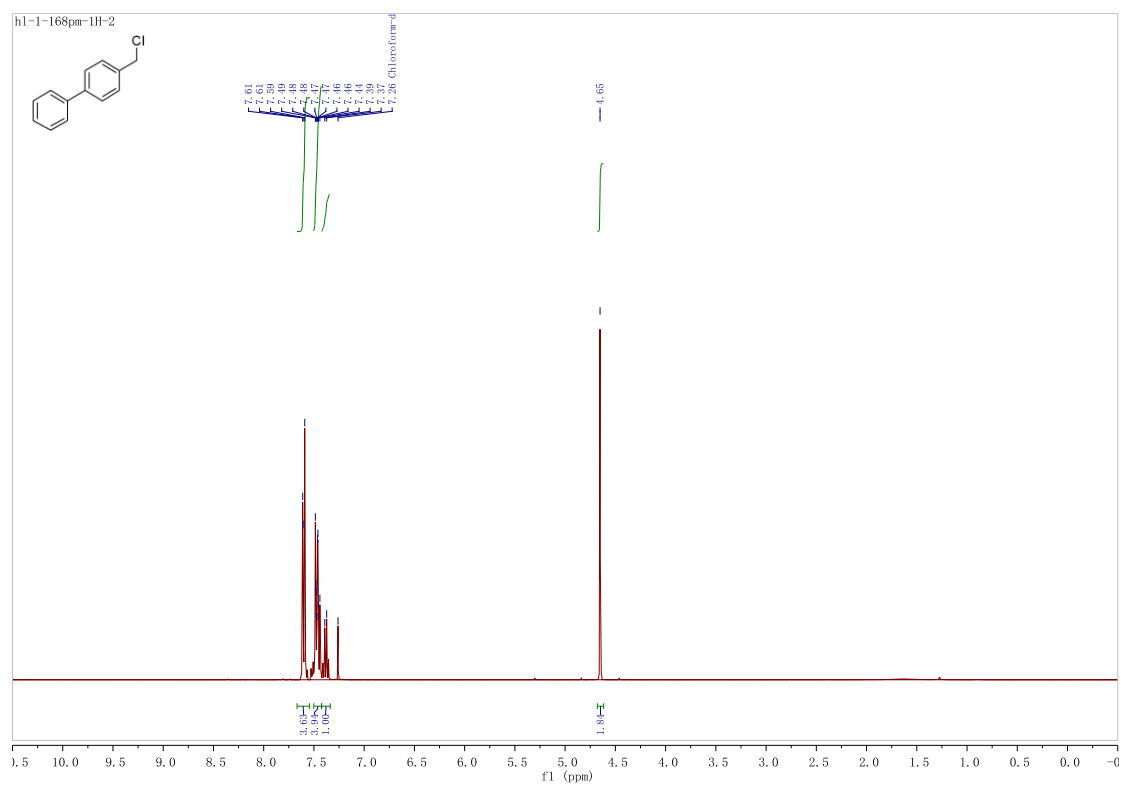

# <sup>13</sup>C NMR of 26

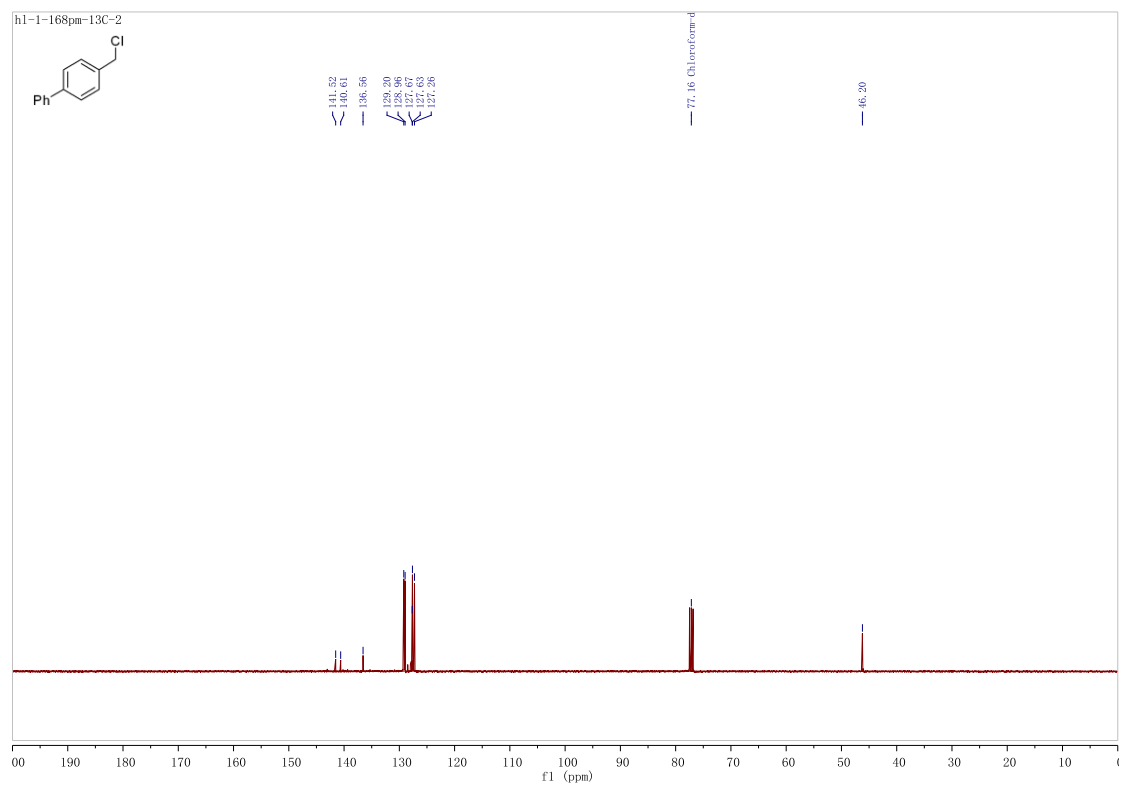



# <sup>1</sup>H NMR of 28

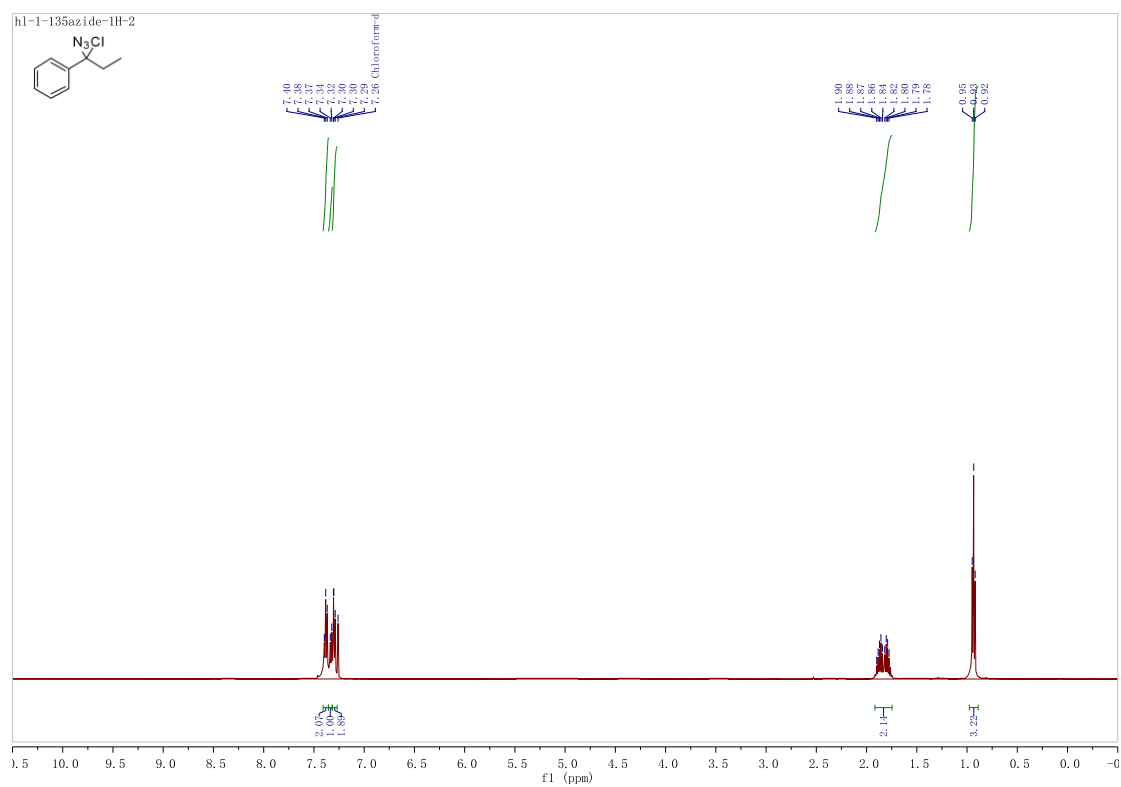

# <sup>13</sup>C NMR of 28

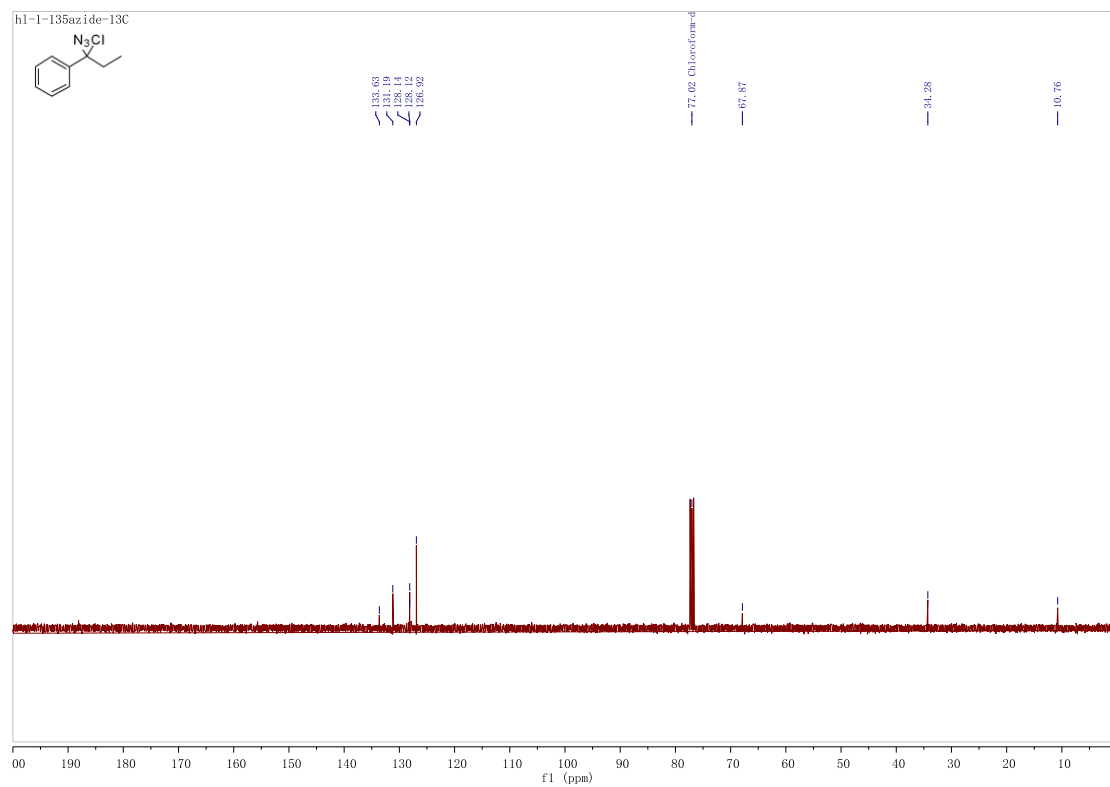

# <sup>1</sup>H NMR of 30

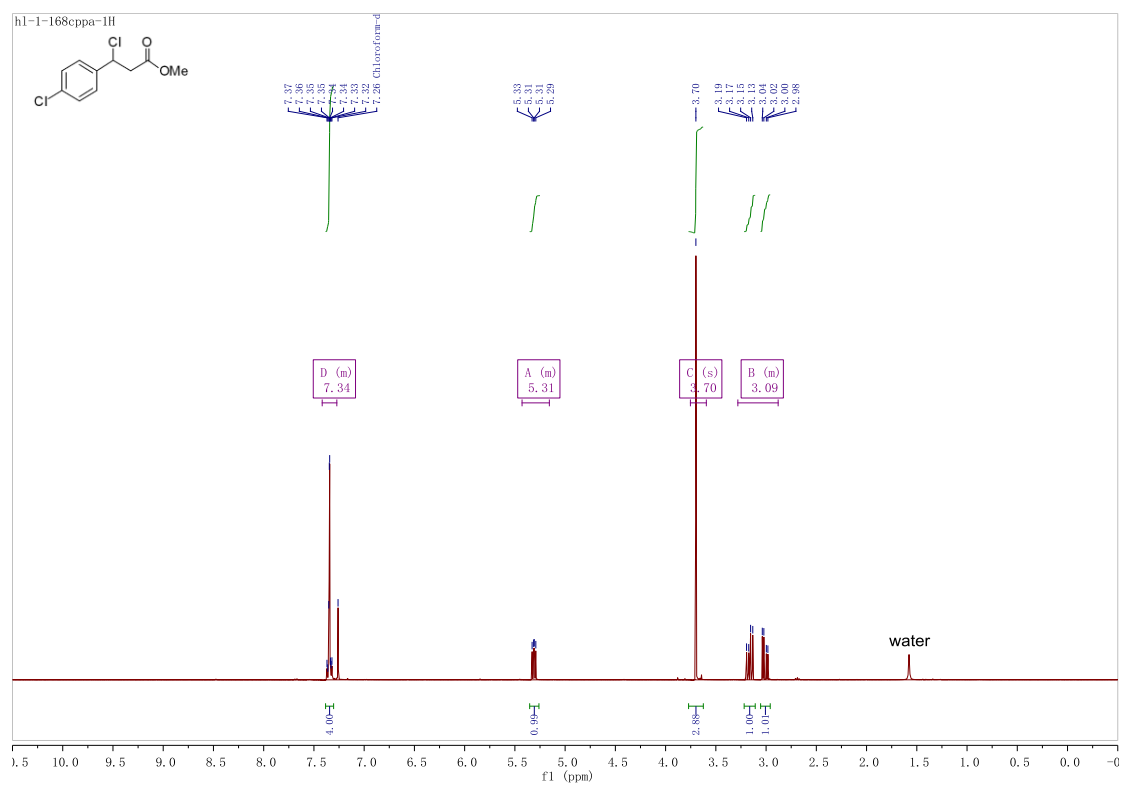

# <sup>13</sup>C NMR of 30

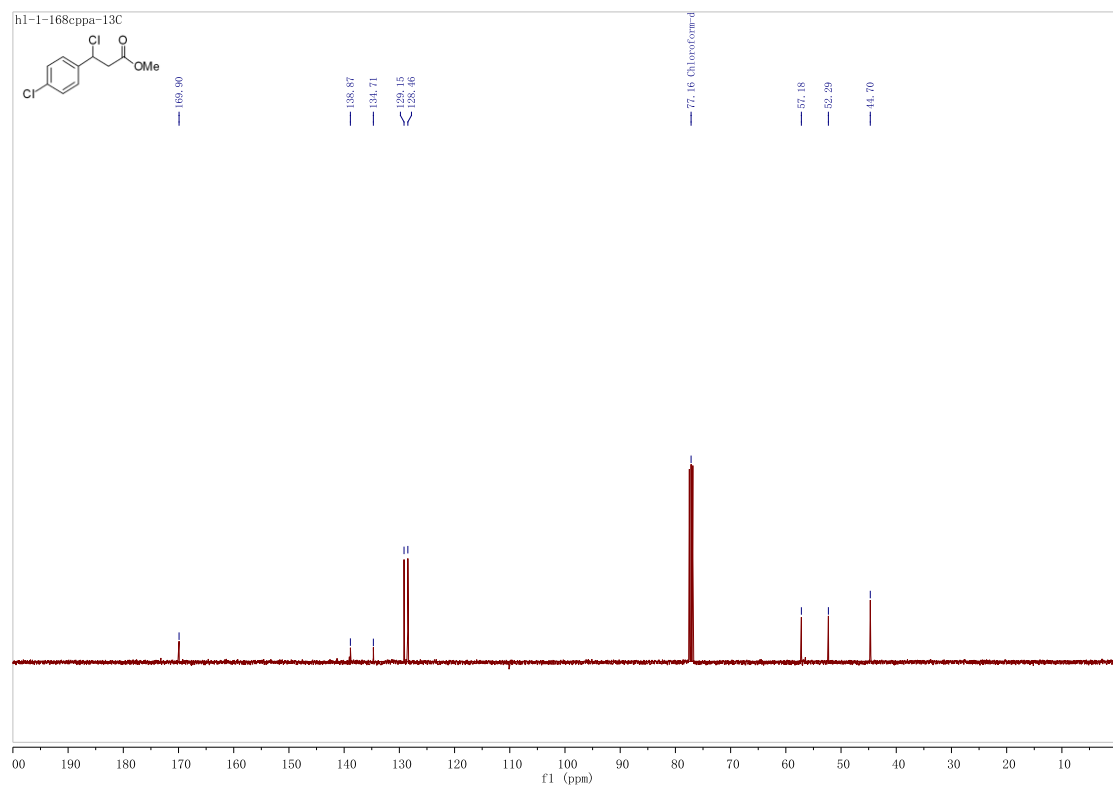

# <sup>1</sup>H NMR of 32

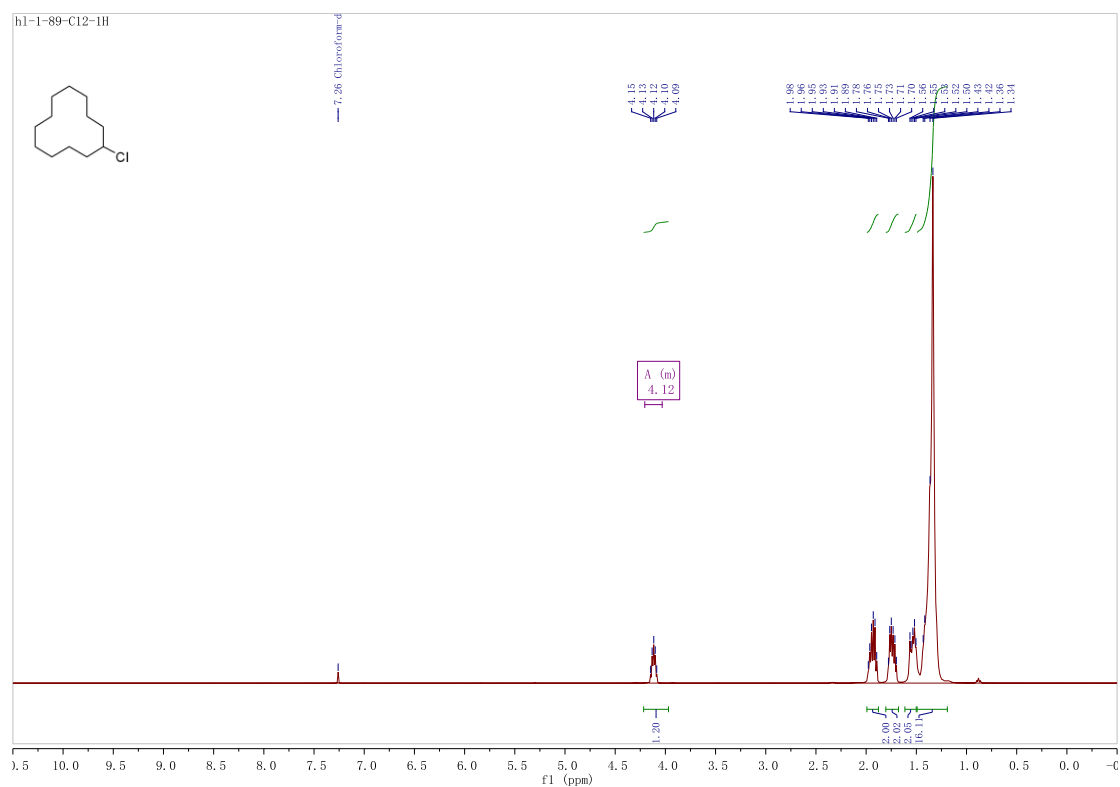

# <sup>13</sup>C NMR of 32

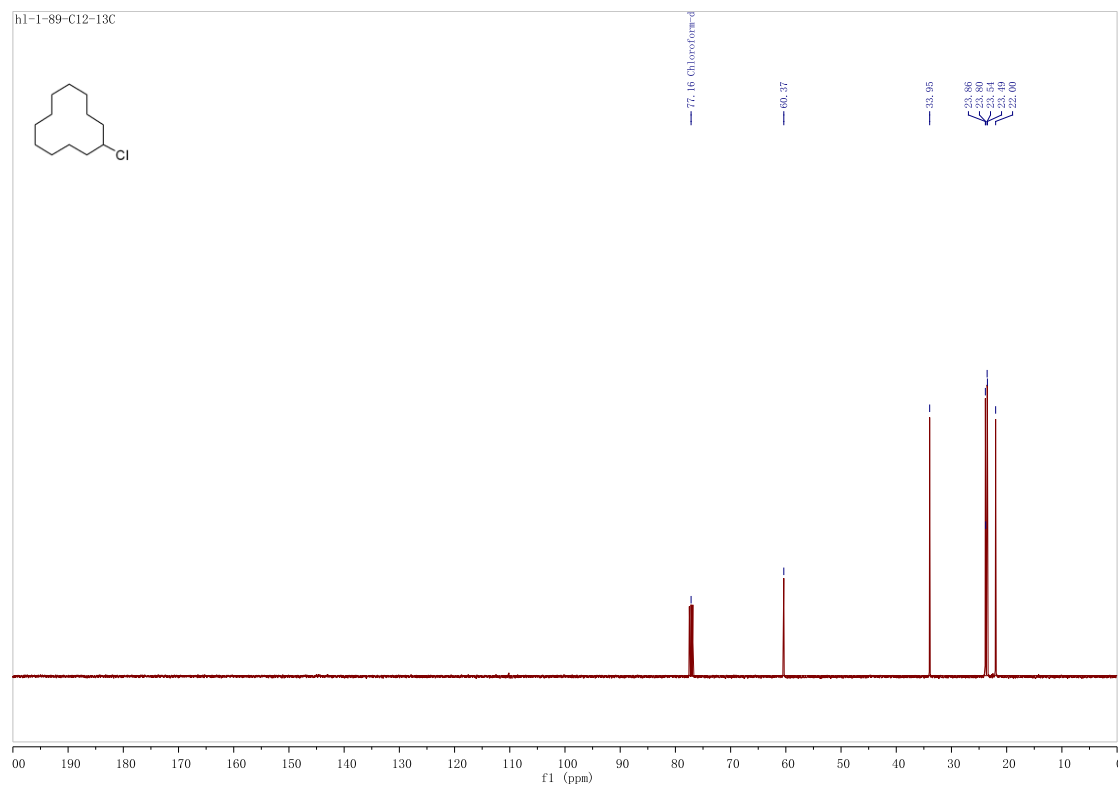

# <sup>1</sup>H NMR of 34

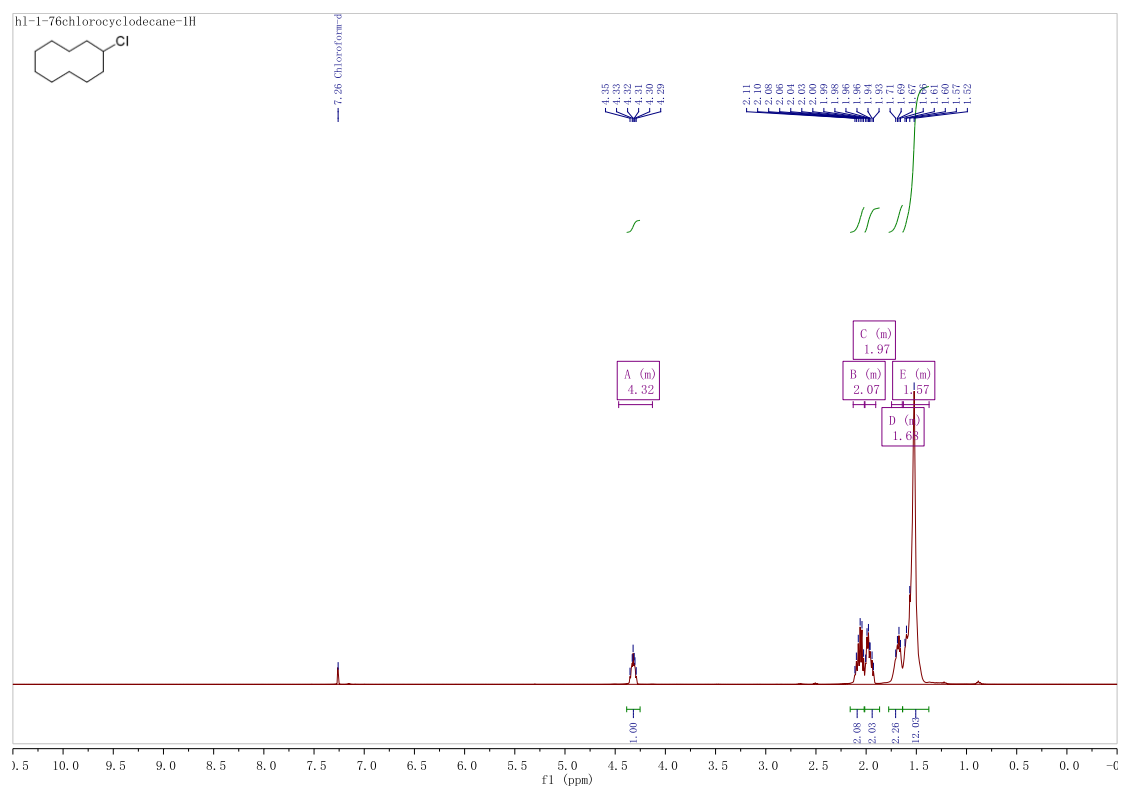

# <sup>13</sup>C NMR of 34

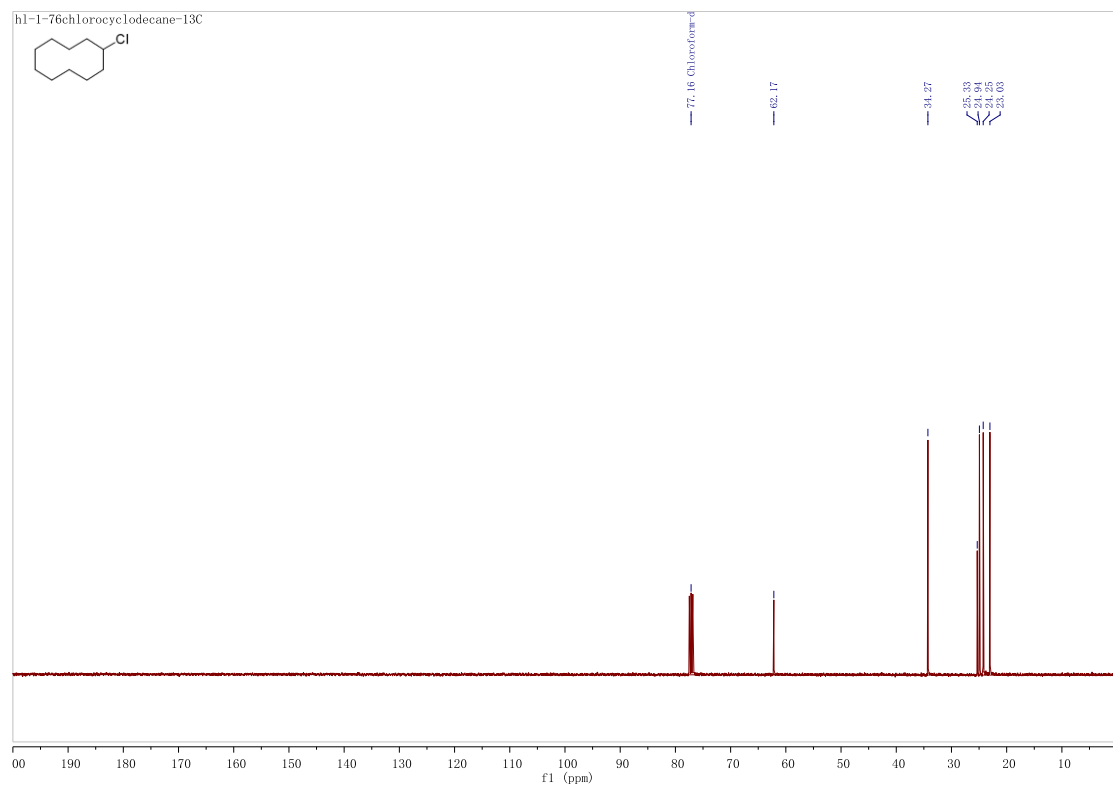

# <sup>1</sup>H NMR of 36

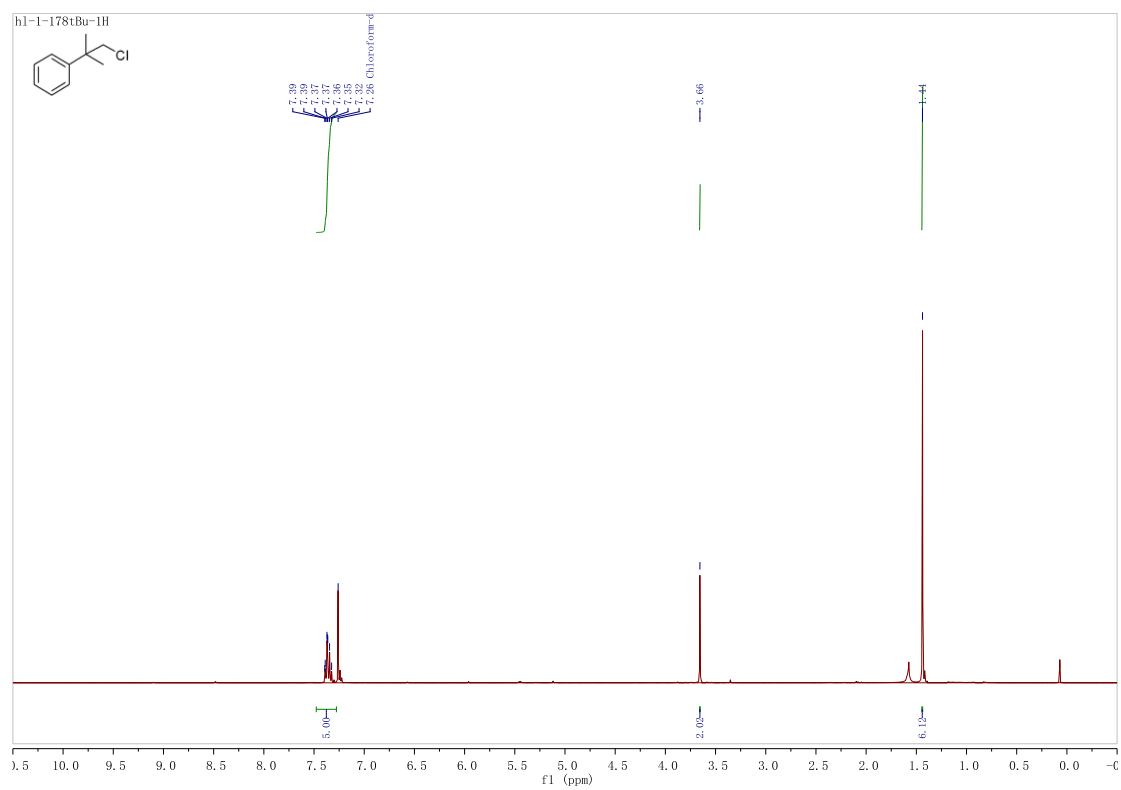

# <sup>13</sup>C NMR of 36

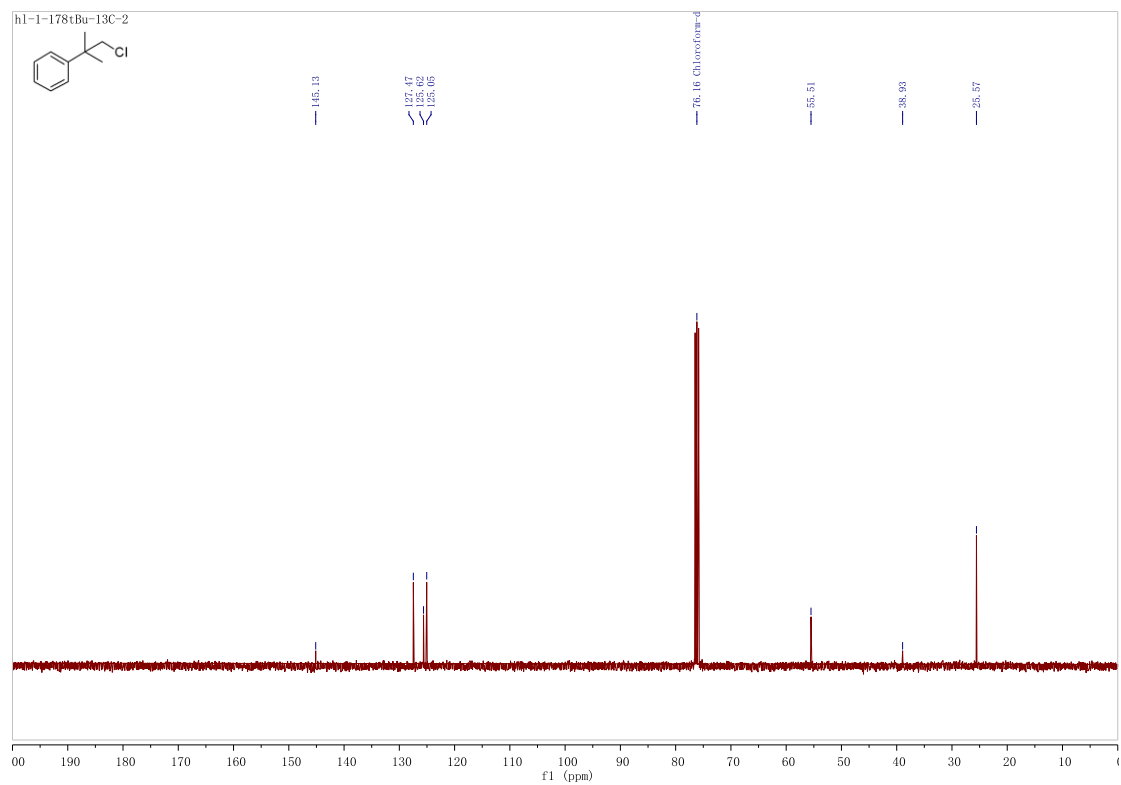

# <sup>1</sup>H NMR of 38

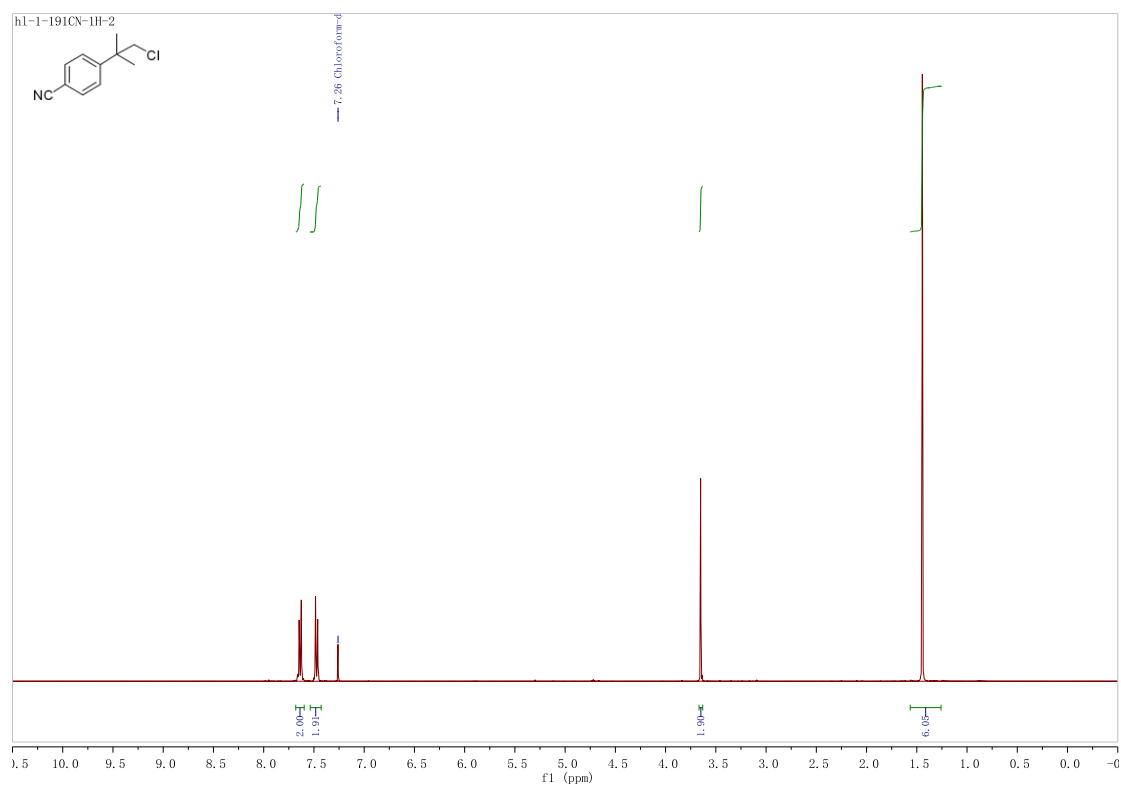

# <sup>13</sup>C NMR of 38

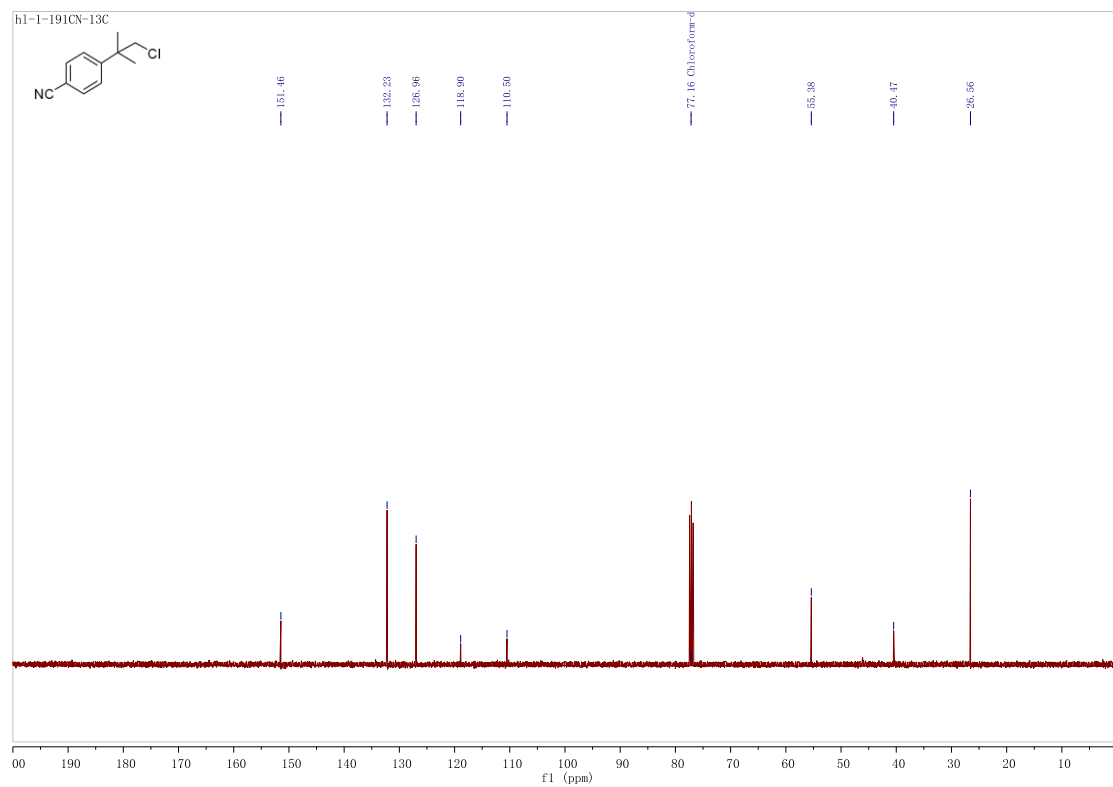

### Crude $^1\text{H}$ NMR of 40

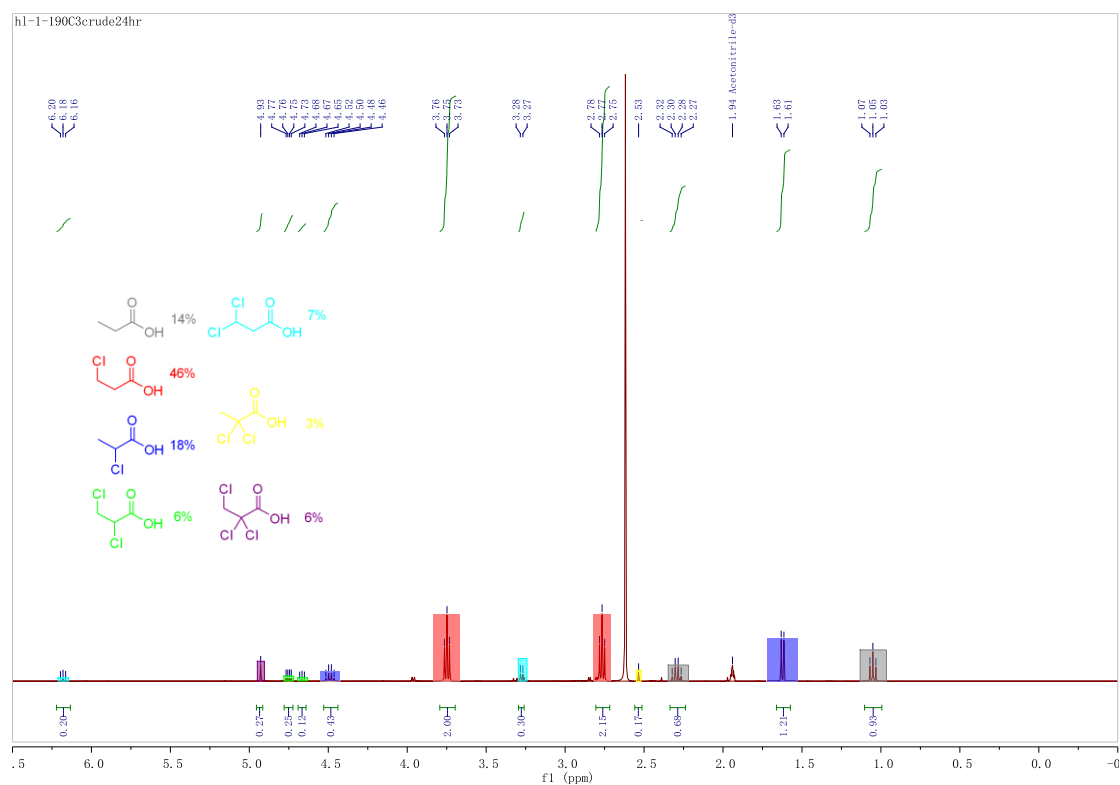

### Crude $^1\text{H}$ NMR of 42

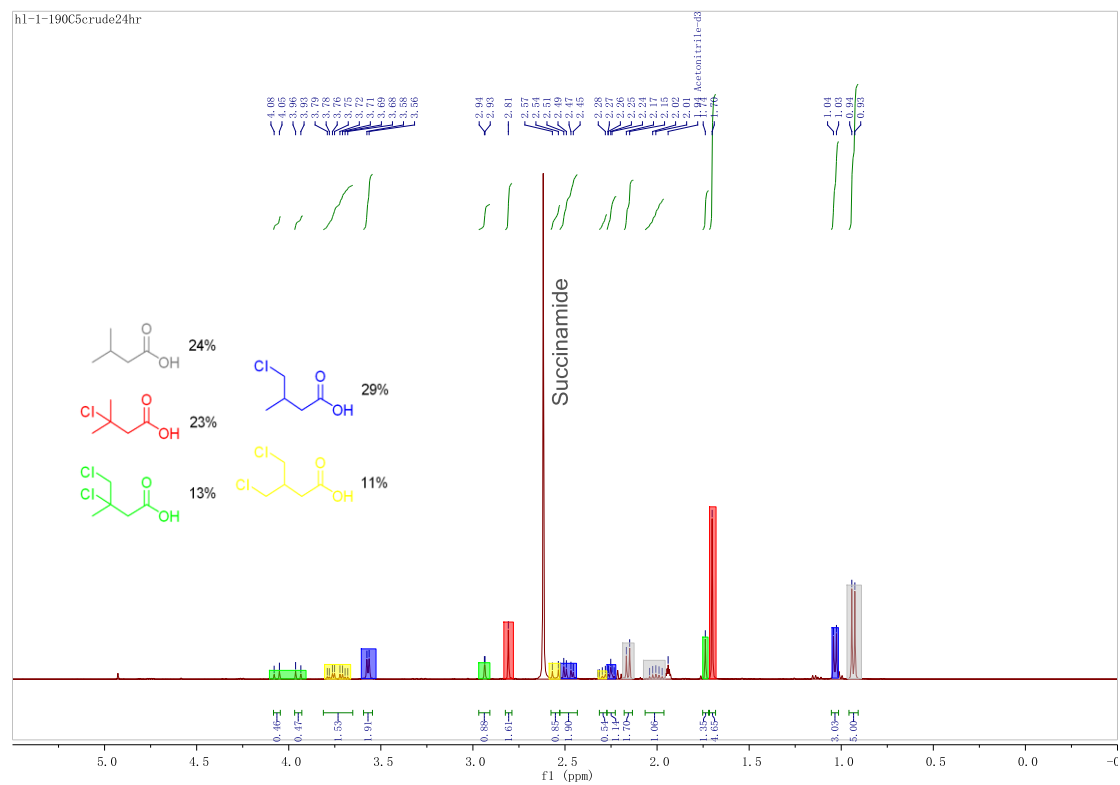

Supplement: NIHMS874461-supplement.pdf [file NIHMS874461-supplement.pdf]
